# Supplementary material for: A benzoperylene probe self-assembled on polyethyleneimine/manganese doped ZnS quantum dots: a new nanocomposite for bright and tunable white light emission
Source: Royal Society of Chemistry journal article supplement (doi:10.1039/c6ra18465k), 2016-01-01
Supplement: c6ra18465k1.pdf [file c6ra18465k1.pdf]

## Supporting Information

### **A Benzoperylene Probe Self-assembled on Polyethyleneimine / Manganese Doped ZnS Quantum Dots: A New Nanocomposite for Bright and Tunable White Light Emission**

Lijia Sang,<sup>a,b</sup> Meiding Yang,<sup>a,b</sup> Huipeng Zhou,<sup>a,b</sup> Xinan Huang,<sup>a,b</sup> and Cong Yu<sup>\*a,b</sup>

<sup>a</sup> State Key Laboratory of Electroanalytical Chemistry, Changchun Institute of Applied Chemistry, Chinese Academy of Sciences, Changchun 130022, P. R. China

<sup>b</sup> Graduate School of the Chinese Academy of Sciences, Beijing 100049, P. R. China

*E-mail: congyu@ciac.ac.cn; Fax: (+86)-431-8526-2710*

**Table S1. Comparison of the phosphor materials used for the generation of white light emission**

| <b>Materials</b>                     | <b>Methods for white light emission generation</b>                                                                                                                        | <b>Notes</b>                                                                                                                                                                  | <b>ref</b> |
|--------------------------------------|---------------------------------------------------------------------------------------------------------------------------------------------------------------------------|-------------------------------------------------------------------------------------------------------------------------------------------------------------------------------|------------|
| <b>Commercial phosphors</b>          | Coating yellow (or combination of green and red) phosphor onto UV LED                                                                                                     | Rare earth based, requires challenging and complex doping/mixing and delicate control of multiple materials and colors; high cost; unsuitable for solution process            | S1, S2     |
| <b>Quantum dots</b>                  | Combination of blue, green, and red emitting QDs; embedded in polymer encapsulant, silica or glass matrix; the use of full visible range covering QDs or hybrid materials | Low stability; complicated synthesis process; narrow emission; difficult size and color blending; self-quenching; re-absorption of light; undesired energy transfer           | S2-S4      |
| <b>Organic compounds</b>             | Combination of different organic dye emitters; organic/polymeric materials; panchromatic emission                                                                         | Concentration quenching; undesired intermolecular interactions; complex energy transfer processes                                                                             | S1, S5, S6 |
| <b>QDs-organic molecules hybrids</b> | Directly mixing; grafting organic molecules onto QDs; multilayer hybrids; layer-by-layer self-assembly; surface-bound                                                     | Fluorescent properties are limited in certain phases; undesired energy or charge transfer between the organic and inorganic components; poor processability                   | S7-S11     |
| <b>Metal-organic frameworks</b>      | Combinations of different metal centers and organic linkers                                                                                                               | Complicated structures; strict control of ingredient ratio and crystal lattice; unsuitable for solution process; excitation light dependent emission                          | S12-S14    |
| <b>Organometallic complexes</b>      | Combination of different chromophores of different colors; emission property tuning via control of structure or aggregation state                                         | Tedious synthesis and purification process; complex energy transfer process; excitation light dependent emission                                                              | S15-S17    |
| <b>This work</b>                     | Self-assembly of benzoperylene probe onto PEI/Mn-ZnS QDs                                                                                                                  | Low cost; simple and mild fabrication process; available in solid, liquid and gel formats; large stokes shift; no self-absorption, energy transfer or concentration quenching |            |

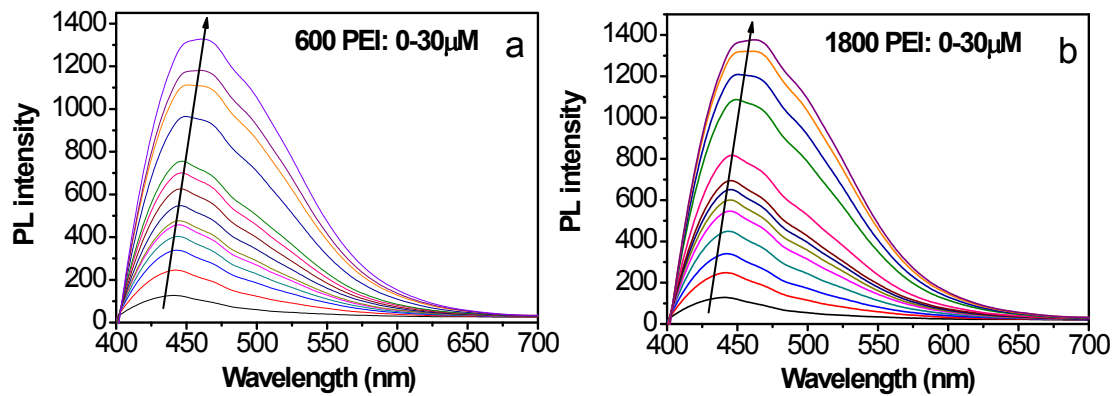

**Figure S1.** Changes in emission spectrum of probe 1 with probe concentration in the presence of 0.2 mg/ml PEI (a) MW=600, (b) MW=1800 g/mol.

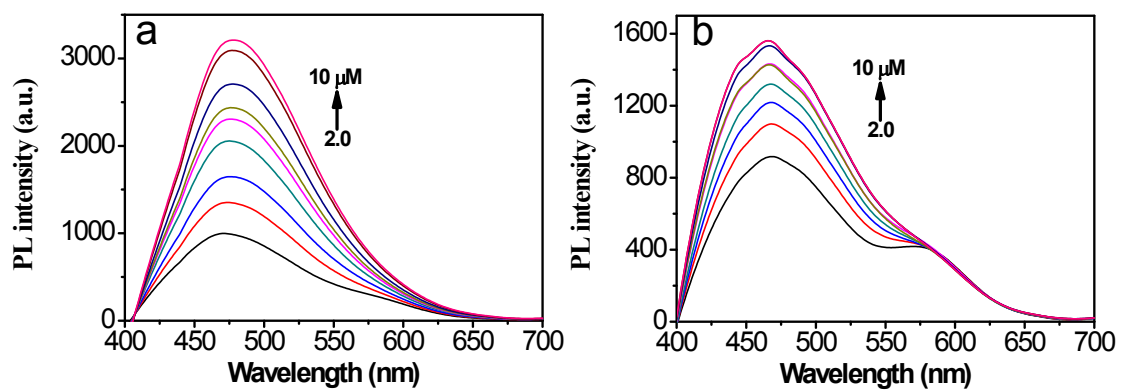

**Figure S2.** Changes in PL emission of the WLENs with high probe 1 concentrations (2-10  $\mu$ M). Conditions: (a) with 10000PEI-QDs; (b) with 1800PEI-QDs. Sample solution contained 5 mM Tris-HCl buffer (pH 7.4) and 50  $\mu$ g/ml PEI/Mn-ZnS QDs.

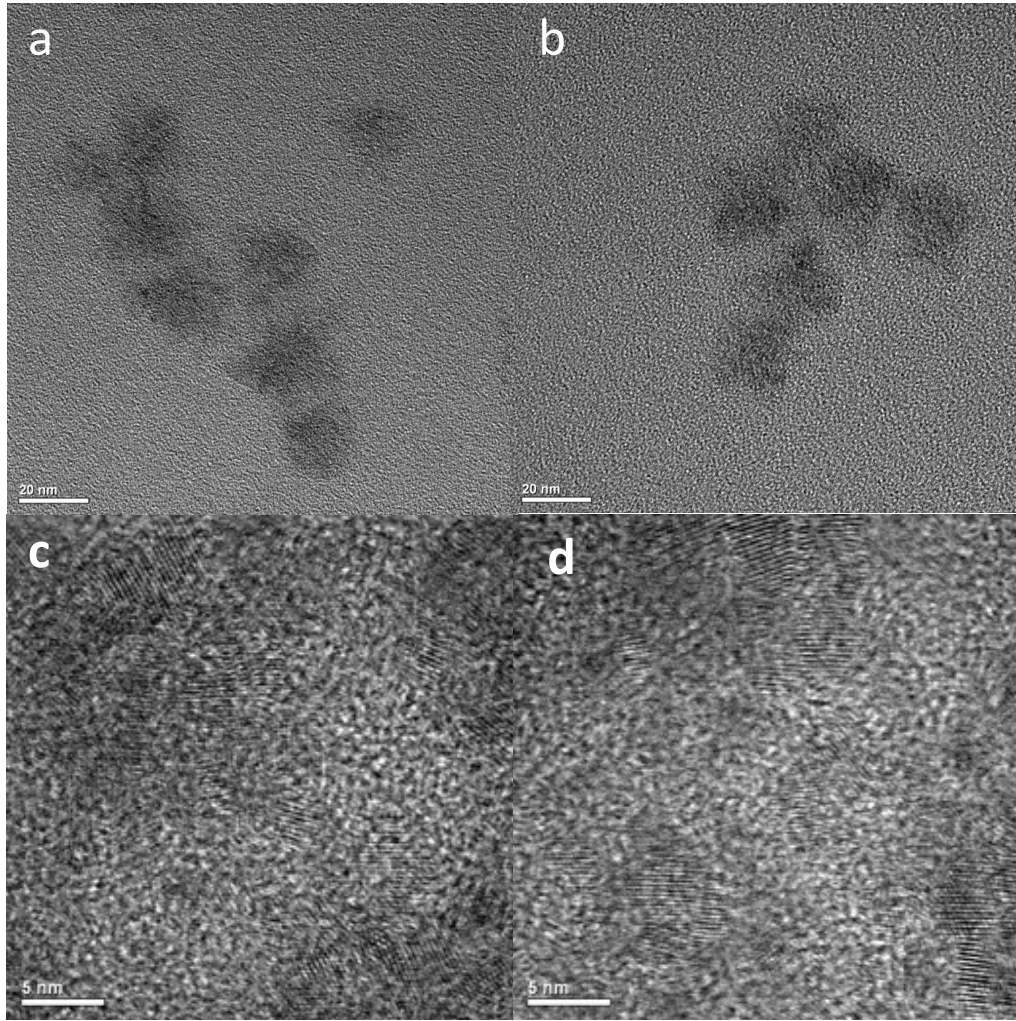

**Figure S3.** HR-TEM images of the (a) PEI/Mn-ZnS QDs and (b) WLENS, amplified HR-TEM images of the (c) PEI/Mn-ZnS QDs and (d) WLENS.

### Size Distribution by Intensity

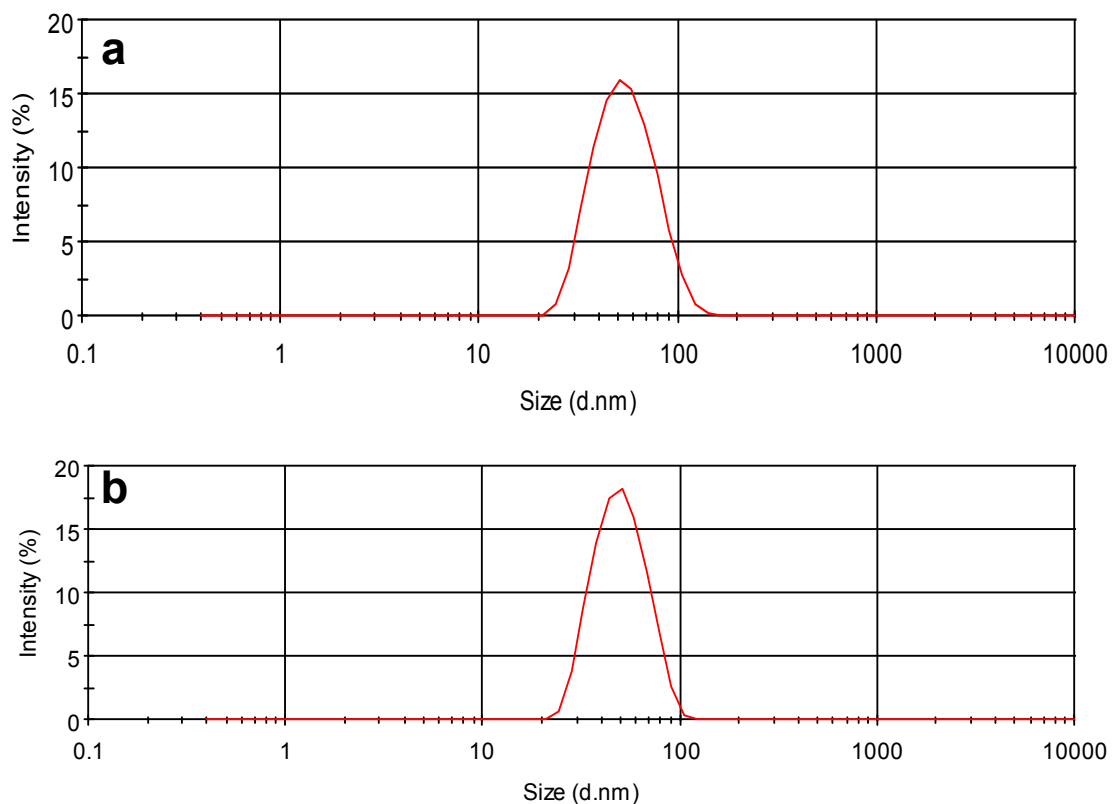

**Figure S4.** Average hydrodynamic diameter of the PEI/Mn-ZnS QDs (a,  $50.7 \pm 0.5$  nm) and the WLEN (b,  $46.7 \pm 0.4$  nm). Please note that the average hydrodynamic diameter determined by DLS (about 50 nm) is considerably larger than the particle size (about 20 nm) determined with TEM. The larger diameter in water is a result of the strong interactions between PEI and the water molecules (hydration interactions).

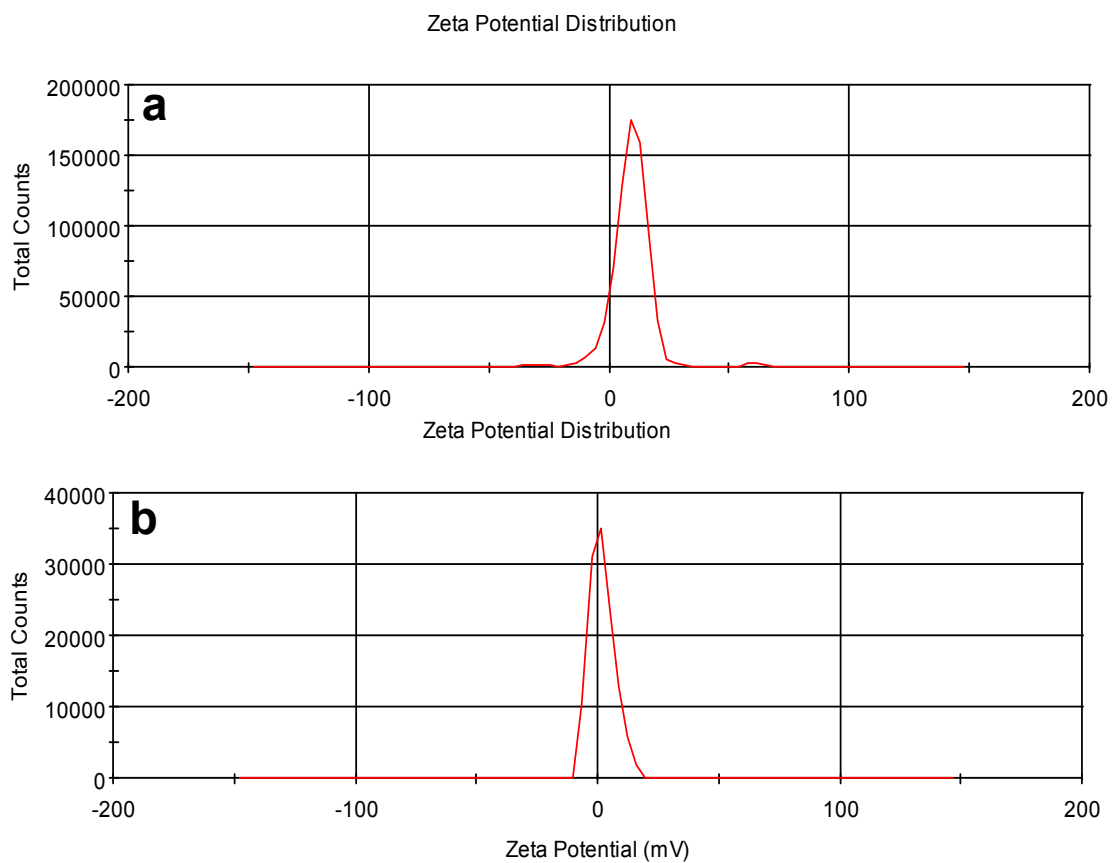

**Figure S5.** Zeta potential values of the PEI/Mn-ZnS QDs (a) and the WLEN (b).

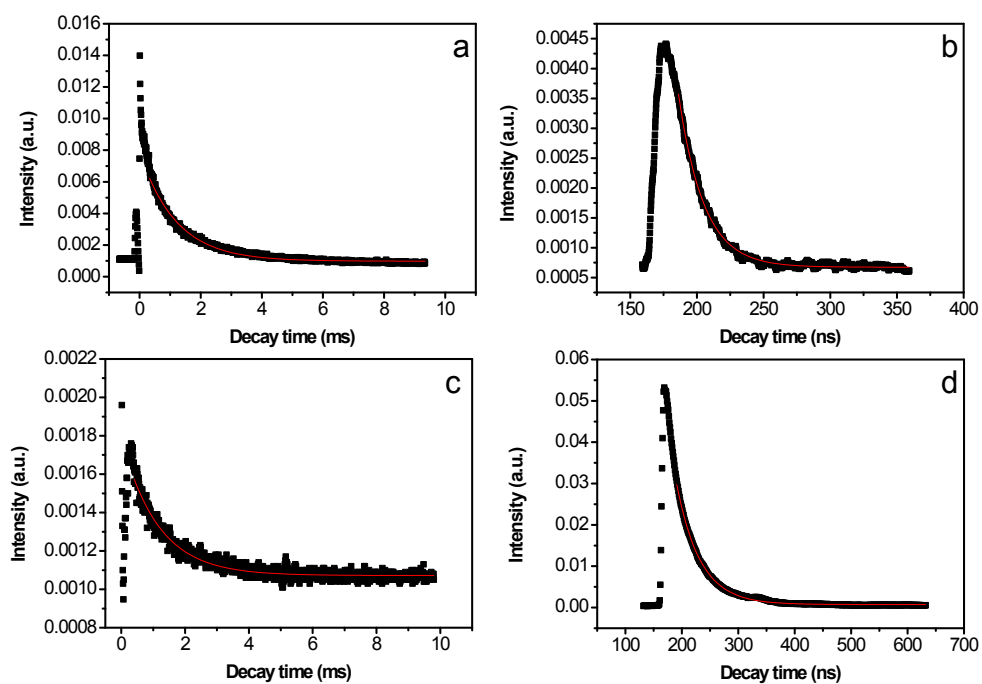

**Figure S6.** PL emission decay curves: (a) PEI/Mn-ZnS QDs (monitored at 580 nm), (b) probe 1 (monitored at 440 nm), (c) WLENs (monitored at 590 nm), (d) WLENs (monitored at 460 nm).

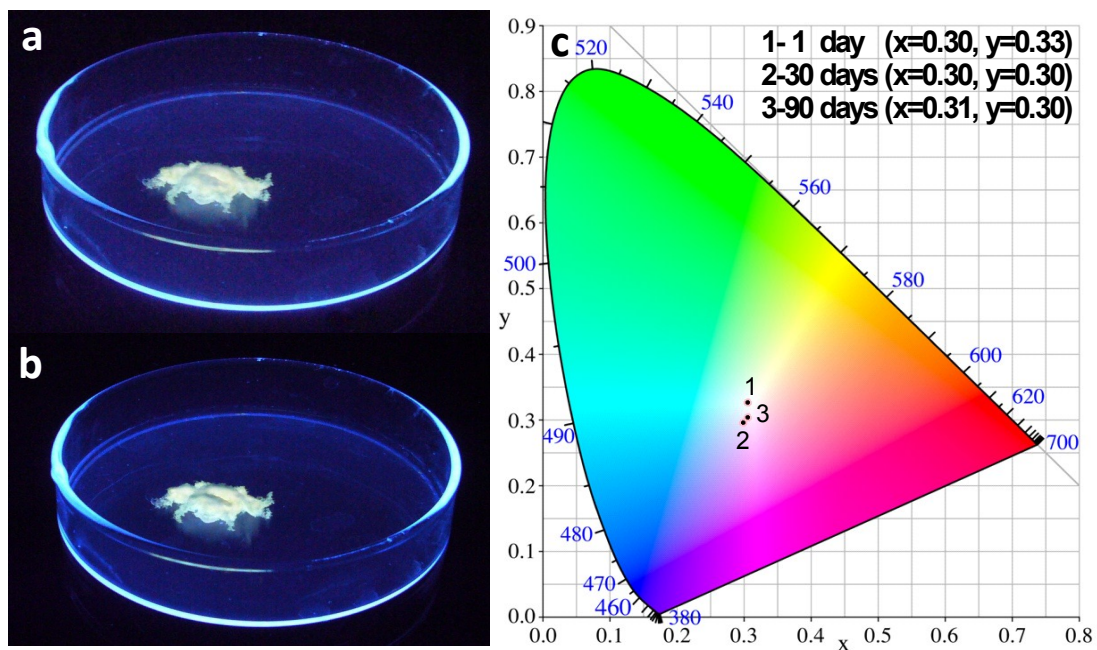

**Figure S7.** Photographs of the freeze-dried WLEN (a) under UV light, (b) after one hour UV light irradiation, (c) CIE coordinates of the WLEN solution after storage at an ambient temperature for a certain period of time (1, 30, and 90 days, respectively).



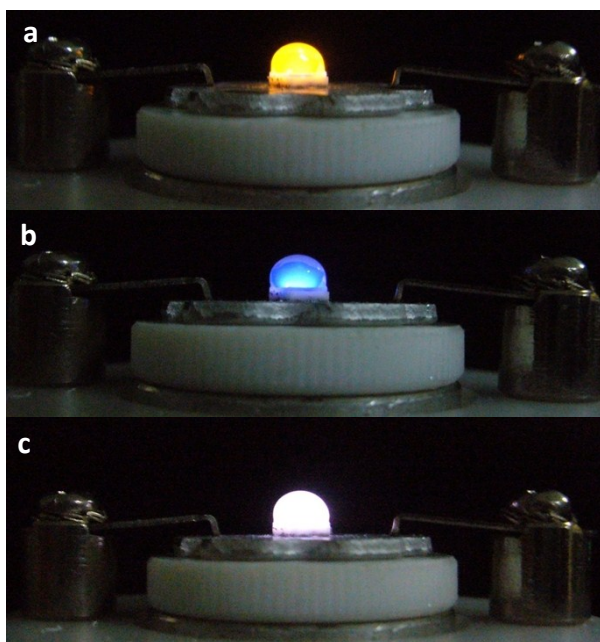

**Figure S8.** Photographs of LED coated with (a) PEI/Mn-ZnS QDs (b) probe 1 (c) WLEN solutions.

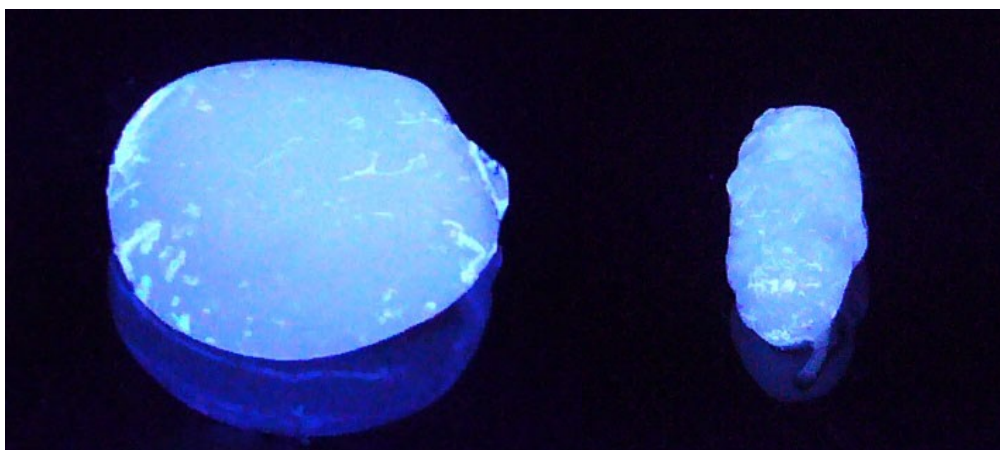

**Figure S9.** WLEN gel under UV light irradiation.

## References

- S1. M. Roushan, X. Zhang and J. Li, *Angew. Chem. Int. Ed.*, 2012, 51, 436.
- S2. Q. Zhang, C. F. Wang, L. T. Ling and S. Chen, *J. Mater. Chem. C*, 2014, 2, 4358.
- S3. I. S. Sohn, S. Unithrattil and W. B. Im, *ACS Appl. Mater. Interfaces*, 2014, 6, 5744.
- S4. X. Wang, X. Yan, W. Li and K. Sun, *Adv. Mater.*, 2012, 24, 2742.
- S5. Q. Y. Yang and J. M. Lehn, *Angew. Chem. Int. Ed.*, 2014, 53, 4572.
- S6. Y. S. Zhao, H. B. Fu, F. Q. Hu, A. D. Peng, W. S. Yang and J. N. Yao, *Adv. Mater.*, 2008, 20, 79.
- S7. T. C. He, Y. Gao, X. D. Lin, R. Chen, W. B. Hu, X. Zhao, Y. Wang, H. V. Demir, Q. L. Fan, A. C. Grimsdale and H. D. Sun, *Macromol. Chem. Phys.*, 2016, 217, 24.
- S8. N. Kim, J. Lee, H. An, C. Pang, S. M. Cho and H. Chae, *J. Mater. Chem. C*, 2014, 2, 9800.
- S9. G. Cheng, M. Mazzeo, A. Rizzo, Y. Li, Y. Duan and G. Gigli, *Appl. Phys. Lett.*, 2009, 94, 243506.
- S10. Q. Zhang, T. Atay, J. R. Tischler, M. S. Bradley, V. Bulovic, A. V. Nurmikko, *Nat. Nanotechnol.*, 2007, 2, 555.
- S11. E. A. McArthur, J. M. Godbe, D. B. Tice, E. A. Weiss, *J. Phys. Chem. C*, 2012, 116, 6136.
- S12. X. Rao, Q. Huang, X. Yang, Y. Cui, Y. Yang, C. Wu, B. Chen and G. Qian, *J. Mater. Chem.*, 2012, 22, 3210.
- S13. M. S. Wang, S. P. Guo, Y. Li, L. Z. Cai, J. P. Zou, G. Xu, W. W. Zhou, F. K. Zheng and G. C. Guo, *J. Am. Chem. Soc.*, 2009, 131, 13572.
- S14. K. Liu, H. You, Y. Zheng, G. Jia, Y. Huang, M. Yang, Y. Song, L. Zhang and H. Zhang, *Cryst. Growth*, 2010, 10, 16.
- S15. M. Han, Y. Tian, Z. Yuan, L. Zhu and B. Ma, *Angew. Chem. Int. Ed.*, 2014, 53, 10908.
- S16. G. J. He, D. Guo, C. He, X. L. Zhang, X. W. Zhao and C. Y. Duan, *Angew. Chem. Int. Ed.*, 2009, 121, 6248.
- S17. A. H. Shelton, I. V. Sazanovich, J. A. Weinstein and M. D. Ward, *Chem. Commun.*, 2012, 48, 2749.
